# Supplementary material for: Metal catalyst free one-pot synthesis of 2-arylbenzimidazoles from α-aroylketene dithioacetals
Source: Royal Society of Chemistry journal article supplement (doi:10.1039/c3ra47761d), 2014-01-01
Supplement: c3ra47761d.pdf [file c3ra47761d.pdf]

*Supporting Information*

**Metal Catalyst Free One-Pot Synthesis of 2-Arylbenzimidazoles From  $\alpha$ -Aroylketene Dithioacetals (AKDTAs)**

Pandi Dhanalakshmi, Solamalai Thimmarayaperumal Shanmugam Sivakumar\*

*Department of Organic chemistry, School of Chemistry,  
Madurai Kamaraj University, Madurai-625 021*

Total pages- S17

**Details of Spectra**

| <b>Fig. No</b> | <b>List of Figures</b>                    | <b>Page</b> |
|----------------|-------------------------------------------|-------------|
| S1             | <sup>1</sup> H NMR Spectrum of <b>1o</b>  | S3          |
| S2             | <sup>13</sup> C NMR Spectrum of <b>1o</b> | S3          |
| S3             | <sup>1</sup> H NMR Spectrum of <b>1p</b>  | S4          |
| S4             | <sup>13</sup> C NMR Spectrum of <b>1p</b> | S4          |
| S5             | <sup>1</sup> H NMR Spectrum of <b>1q</b>  | S5          |
| S6             | <sup>13</sup> C NMR Spectrum of <b>1q</b> | S5          |
| S7             | <sup>1</sup> H NMR Spectrum of <b>1r</b>  | S6          |
| S8             | <sup>13</sup> C NMR Spectrum of <b>1r</b> | S6          |
| S9             | <sup>1</sup> H NMR Spectrum of <b>1s</b>  | S7          |
| S10            | <sup>13</sup> C NMR Spectrum of <b>1s</b> | S7          |
| S11            | <sup>13</sup> H NMR Spectrum of <b>1t</b> | S8          |
| S12            | <sup>13</sup> C NMR Spectrum of <b>1t</b> | S8          |
| S13            | <sup>1</sup> H NMR Spectrum of <b>1u</b>  | S9          |
| S14            | <sup>13</sup> C NMR Spectrum of <b>1u</b> | S9          |
| S15            | <sup>1</sup> H NMR Spectrum of <b>1v</b>  | S10         |
| S16            | <sup>13</sup> C NMR Spectrum of <b>1v</b> | S10         |

|     |                                           |     |
|-----|-------------------------------------------|-----|
| S17 | <sup>1</sup> H NMR Spectrum of <b>4g</b>  | S11 |
| S18 | <sup>13</sup> C NMR Spectrum of <b>4g</b> | S11 |
| S19 | <sup>1</sup> H NMR Spectrum of <b>4j</b>  | S12 |
| S20 | <sup>13</sup> C NMR Spectrum of <b>4j</b> | S12 |
| S21 | <sup>1</sup> H NMR Spectrum of <b>4o</b>  | S13 |
| S22 | <sup>13</sup> C NMR Spectrum of <b>4o</b> | S13 |
| S23 | <sup>1</sup> H NMR Spectrum of <b>4p</b>  | S14 |
| S24 | <sup>13</sup> C NMR Spectrum of <b>4p</b> | S14 |
| S25 | <sup>1</sup> H NMR Spectrum of <b>4s</b>  | S15 |
| S26 | <sup>13</sup> C NMR Spectrum of <b>4s</b> | S15 |
| S27 | <sup>13</sup> H NMR Spectrum of <b>4u</b> | S16 |
| S28 | <sup>13</sup> C NMR Spectrum of <b>4u</b> | S16 |
| S29 | <sup>1</sup> H NMR Spectrum of <b>4v</b>  | S17 |
| S30 | <sup>13</sup> C NMR Spectrum of <b>4v</b> | S17 |

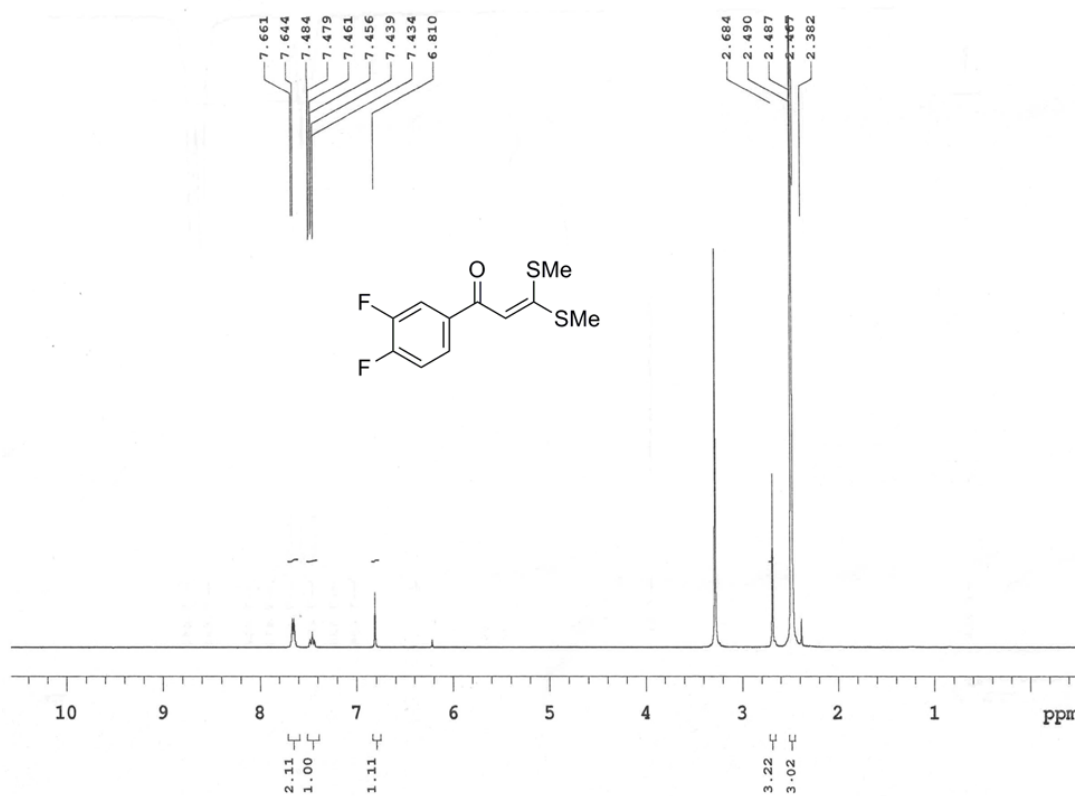

**Figure S1:** (400MHz, DMSO- $d_6$ )  $^1\text{H}$  NMR spectrum of compound **1o**

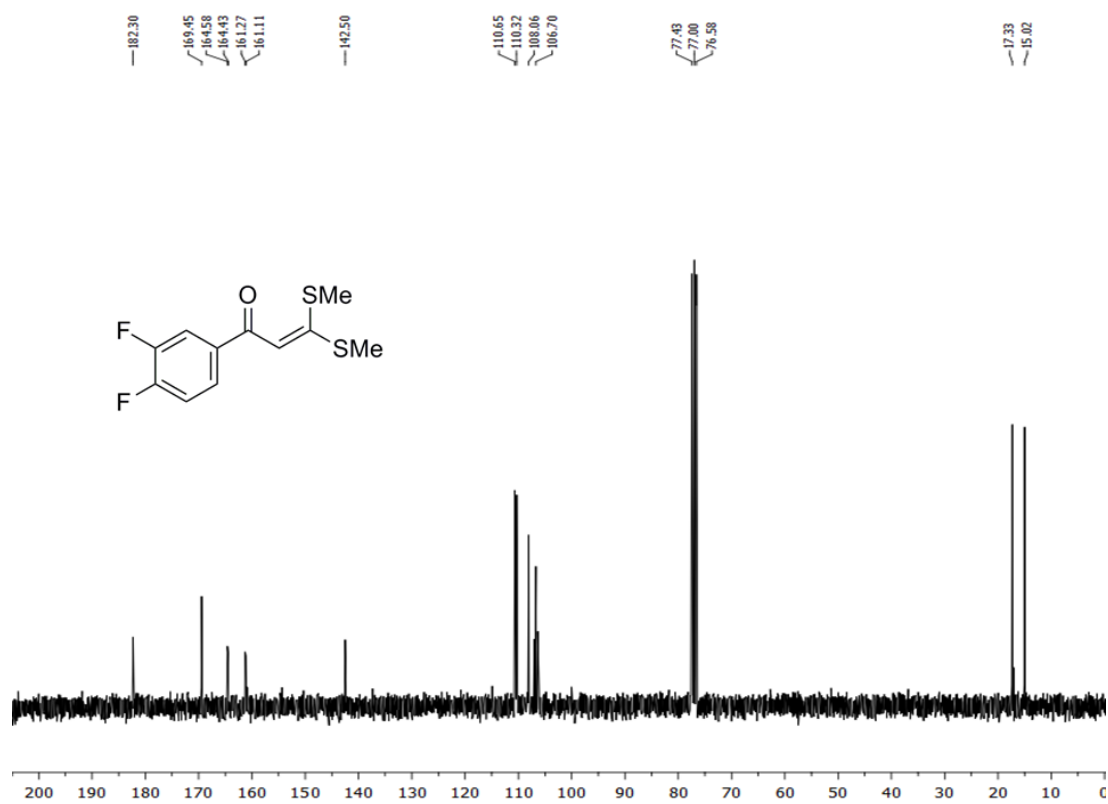

**Figure S2:** (75MHz,  $\text{CDCl}_3$ )  $^{13}\text{C}$  NMR spectrum of compound **1o**

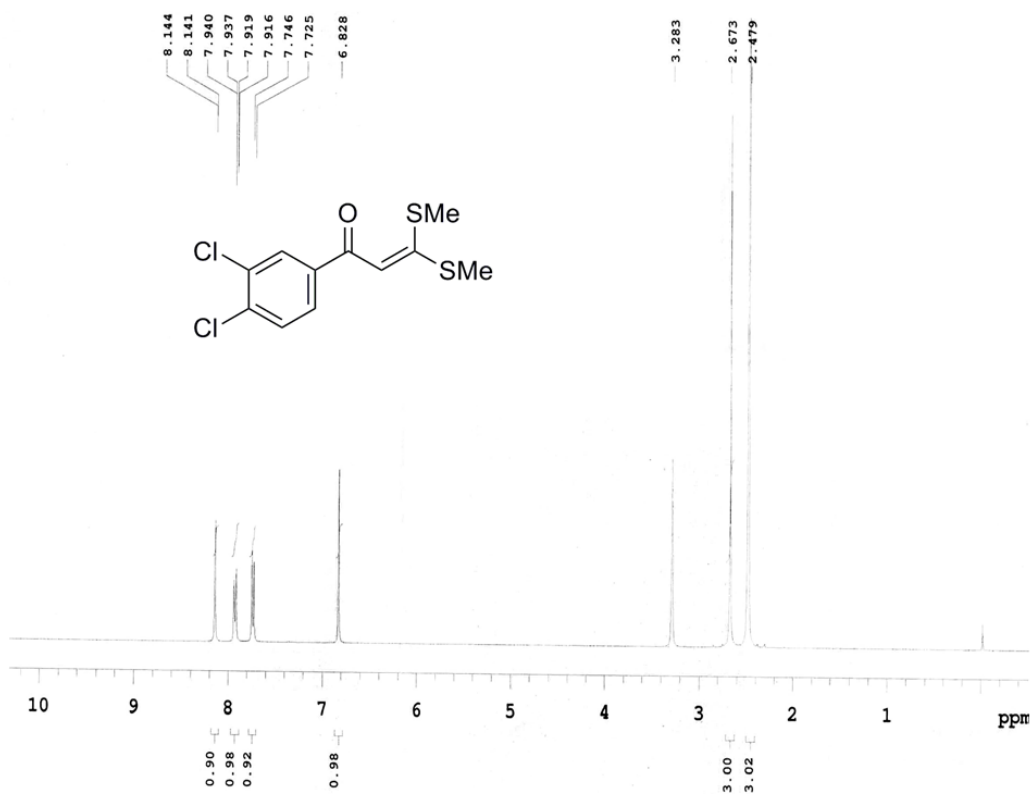

**Figure S3:** (400MHz, DMSO- $d_6$ )  $^1\text{H}$  NMR spectrum of compound **1p**

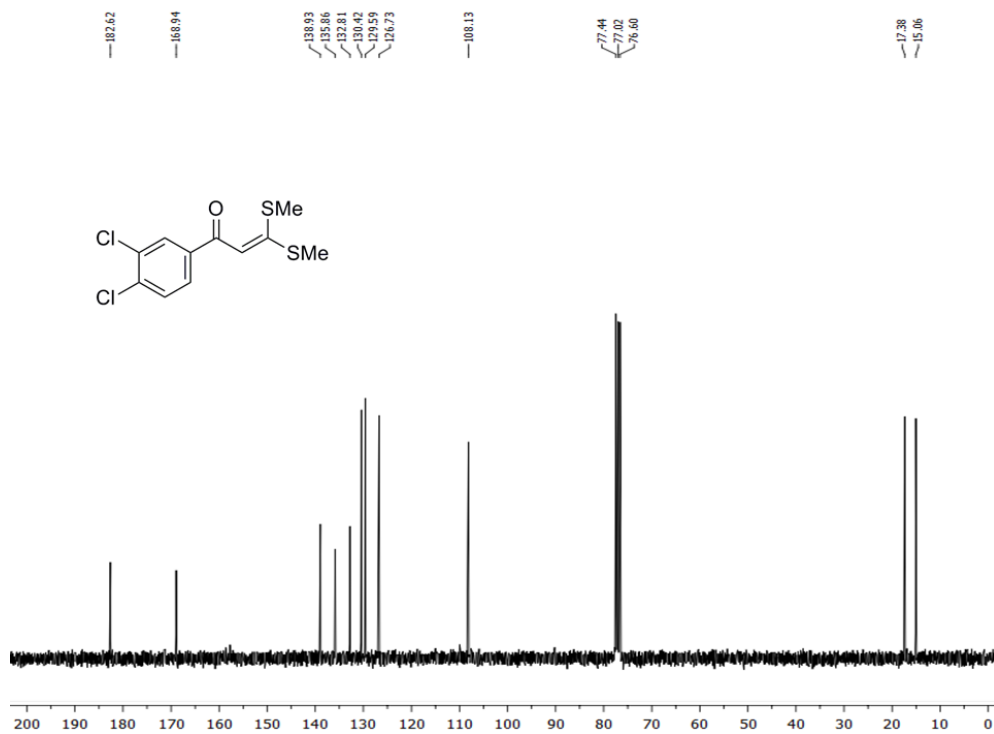

**Figure S4:** (75MHz,  $\text{CDCl}_3$ )  $^{13}\text{C}$  NMR spectrum of compound **1p**

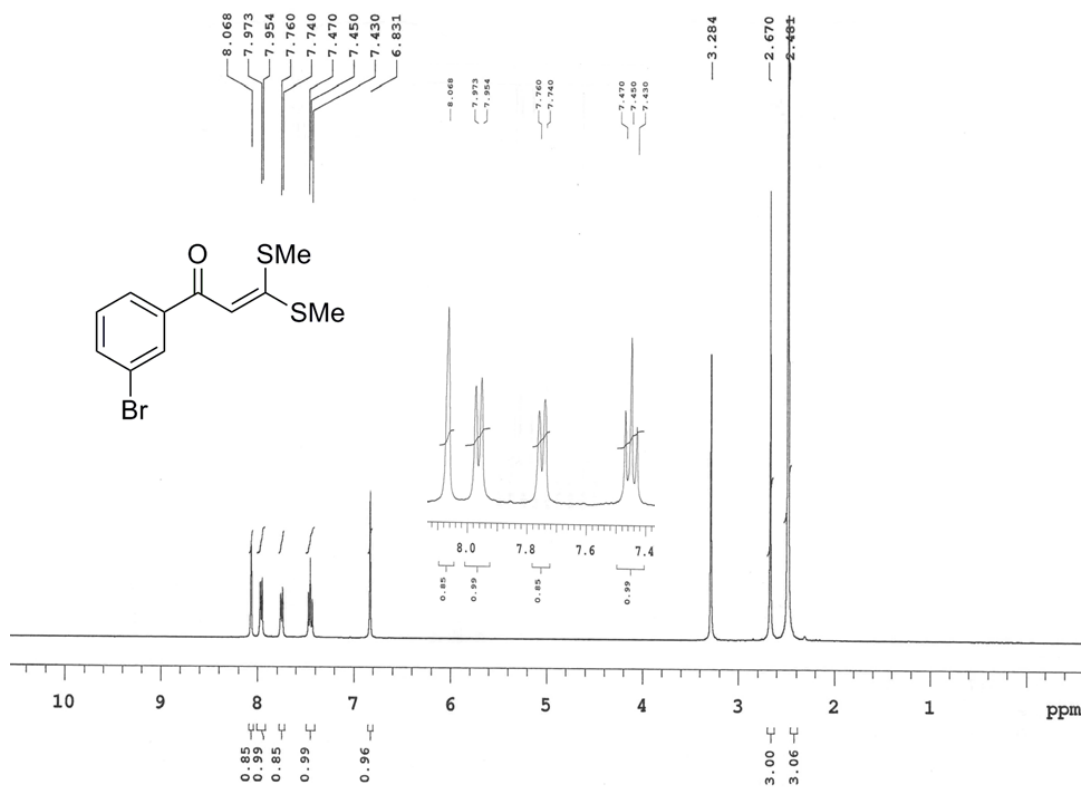

**Figure S5:** (400MHz, DMSO-d<sub>6</sub>) <sup>1</sup>H NMR spectrum of compound **1q**

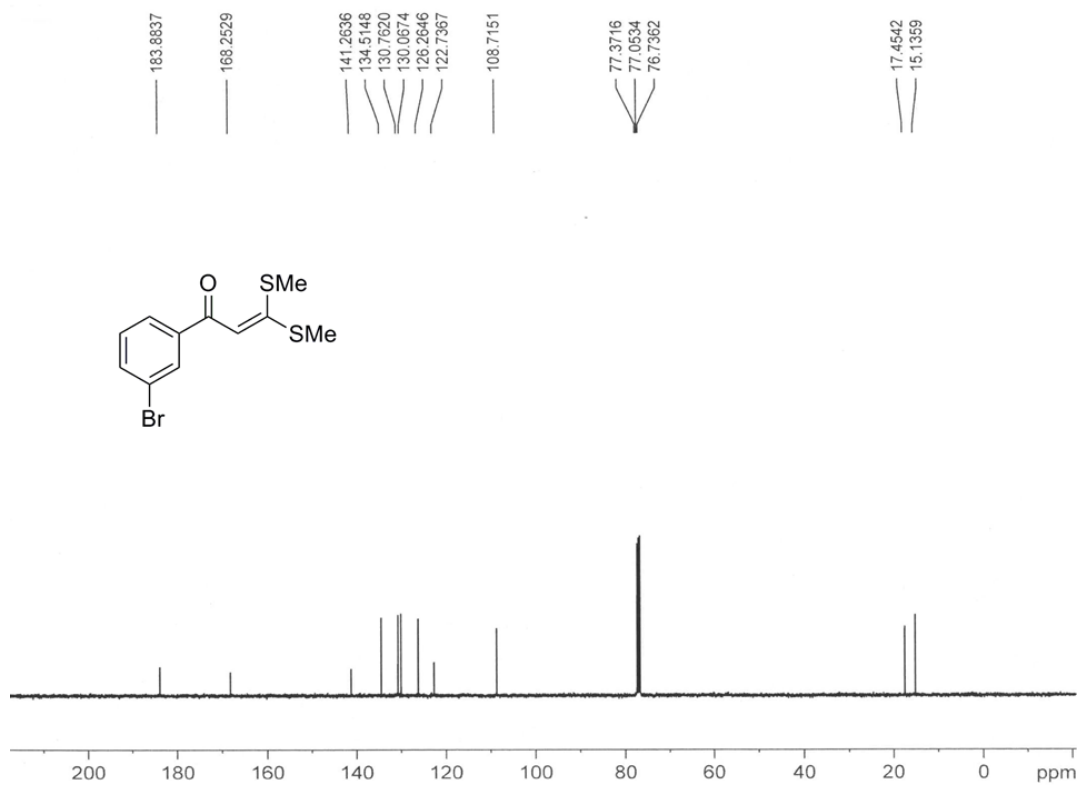

**Figure S6:** (100MHz, CDCl<sub>3</sub>) <sup>13</sup>C NMR spectrum of compound **1q**

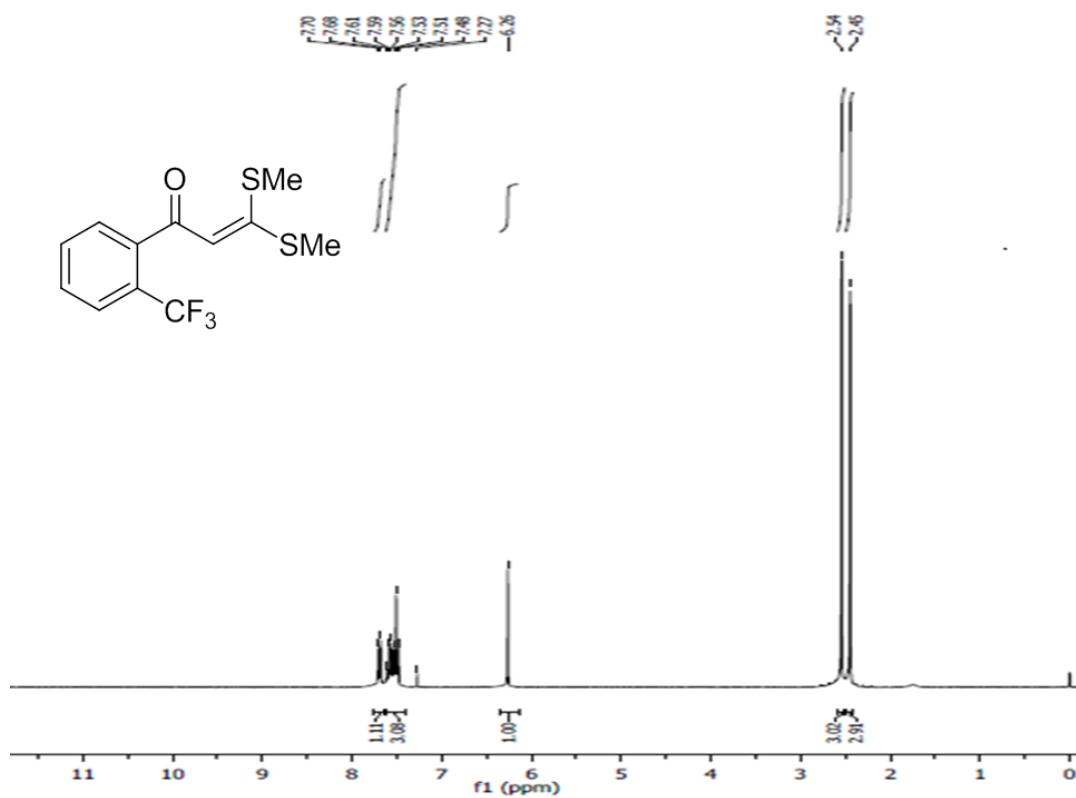

**Figure S7:** (300MHz, CDCl<sub>3</sub>) <sup>1</sup>H NMR spectrum of compound **1r**

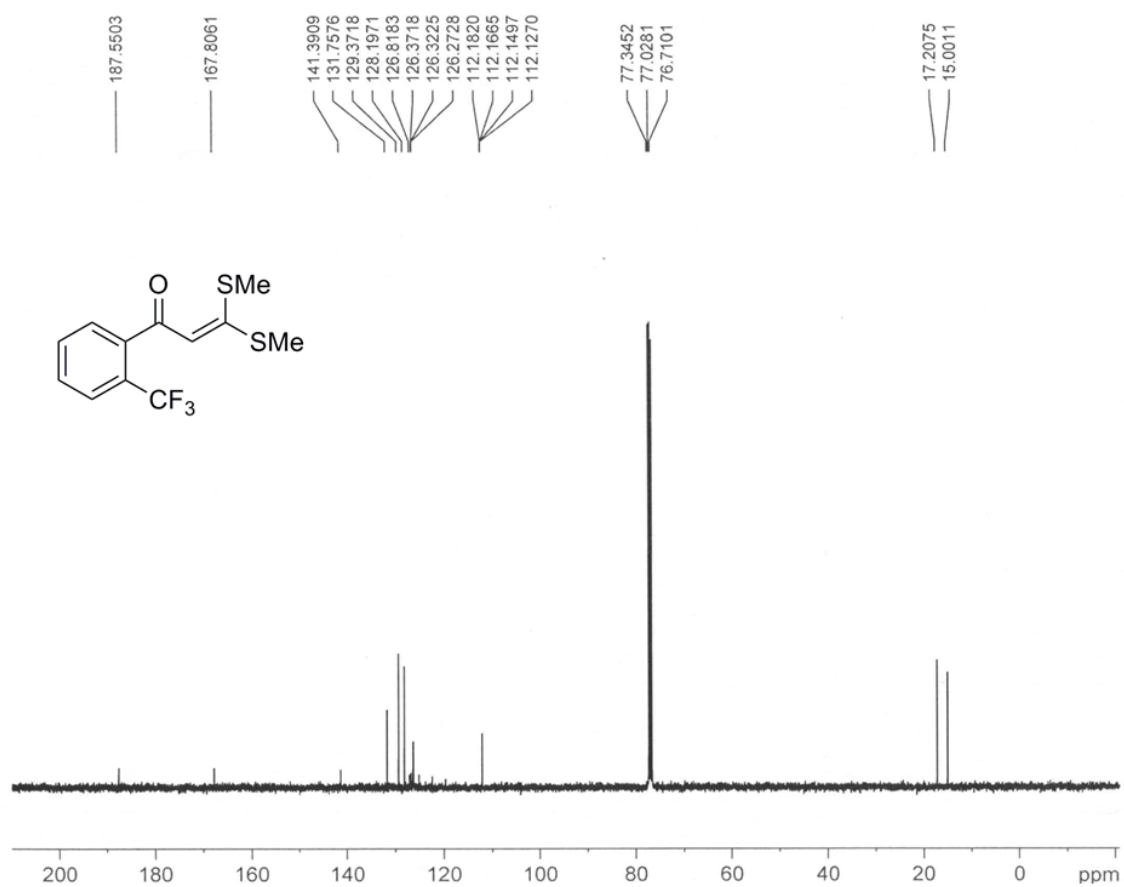

**Figure S8:** (100MHz, CDCl<sub>3</sub>) <sup>13</sup>C NMR spectrum of compound **1r**

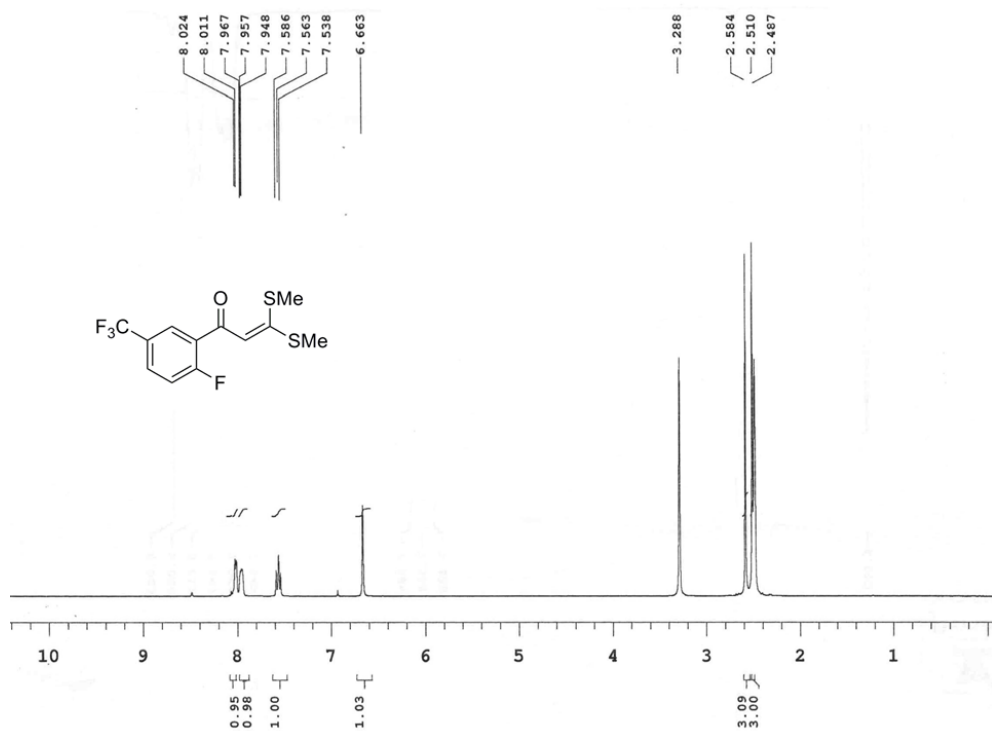

**Figure S9:** (400MHz, DMSO- $d_6$ )  $^1\text{H}$  NMR spectrum of compound **1s**

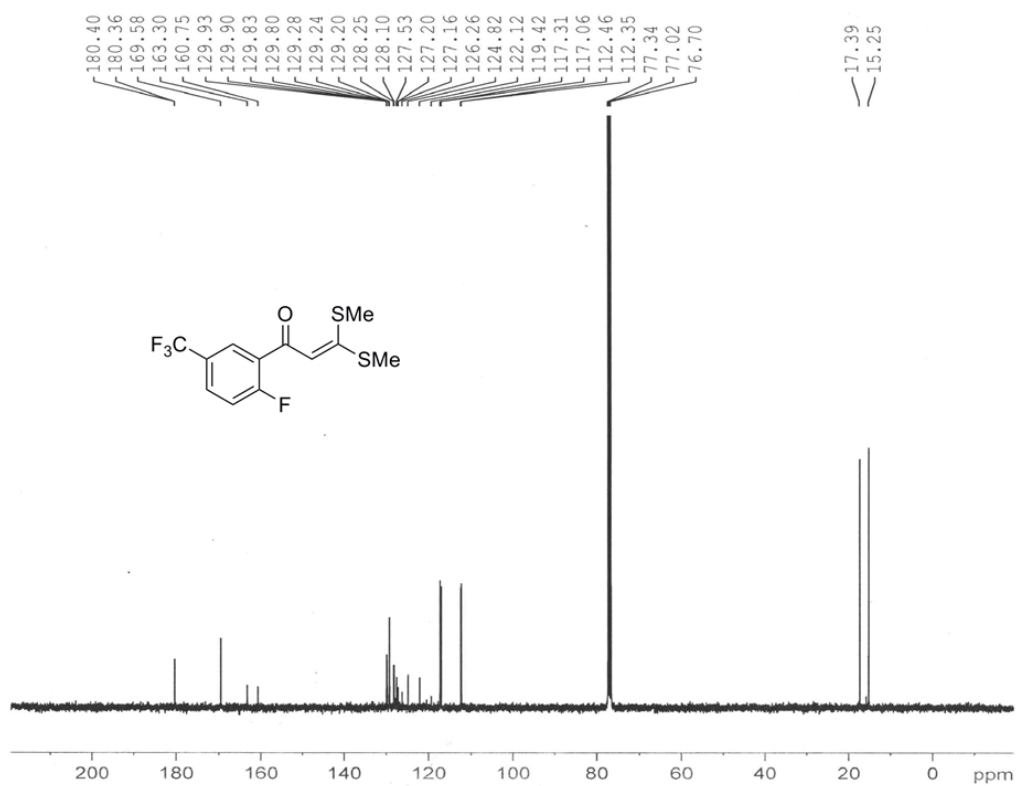

**Figure S10:** (100MHz,  $\text{CDCl}_3$ )  $^{13}\text{C}$  NMR spectrum of compound **1s**

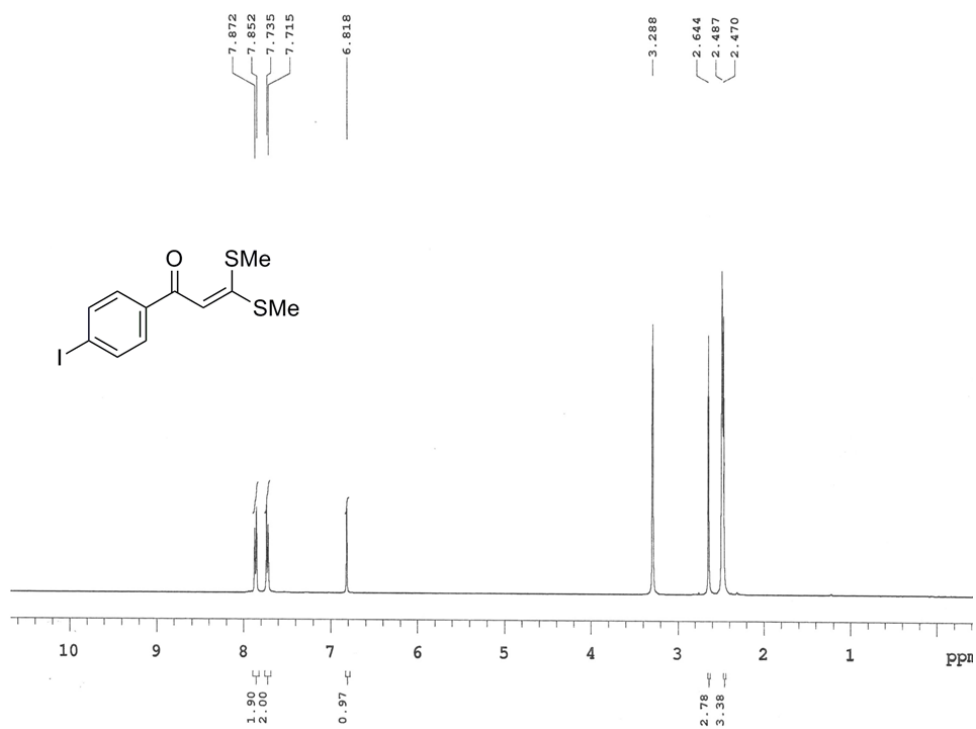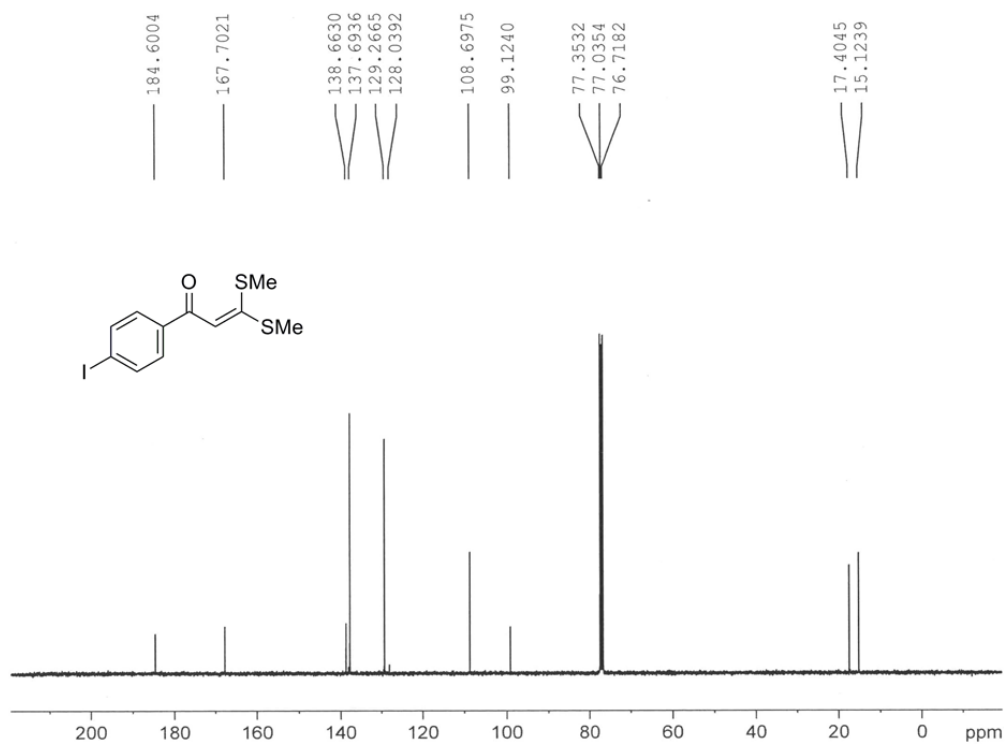



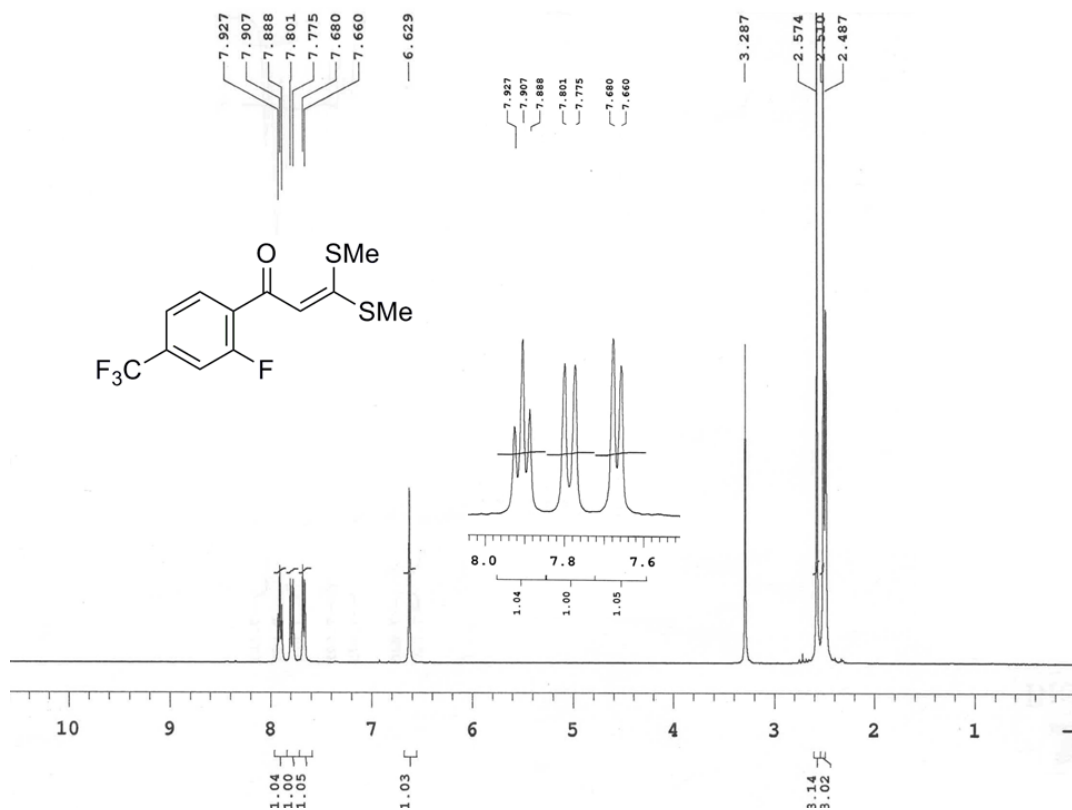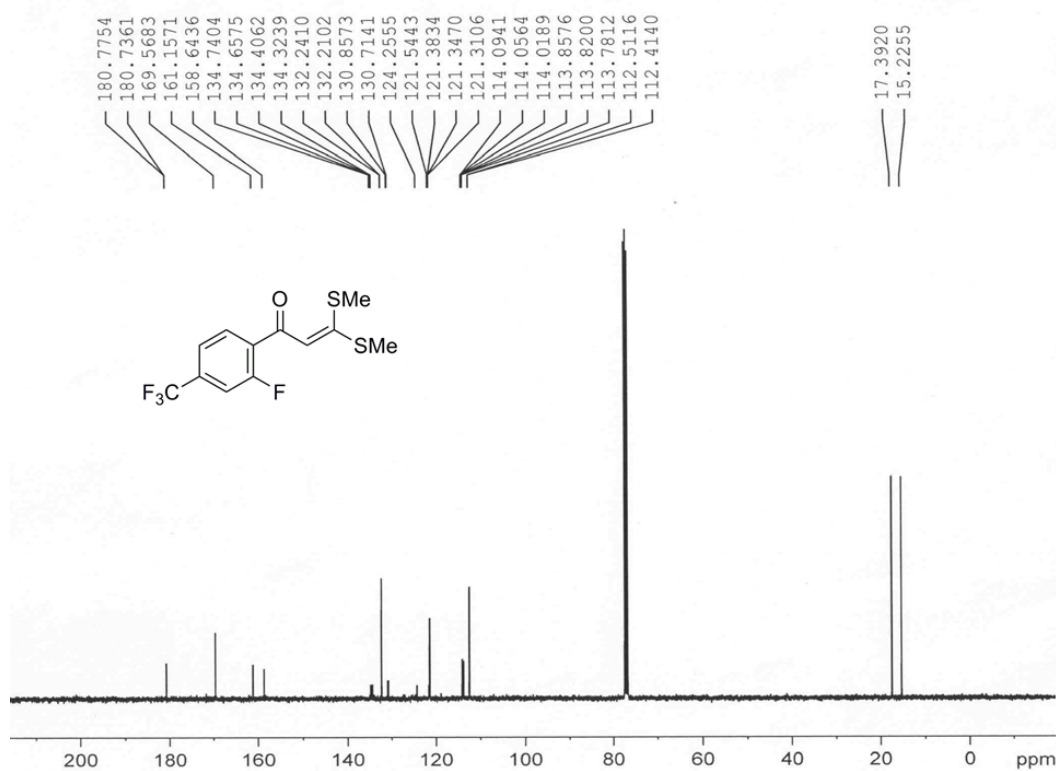

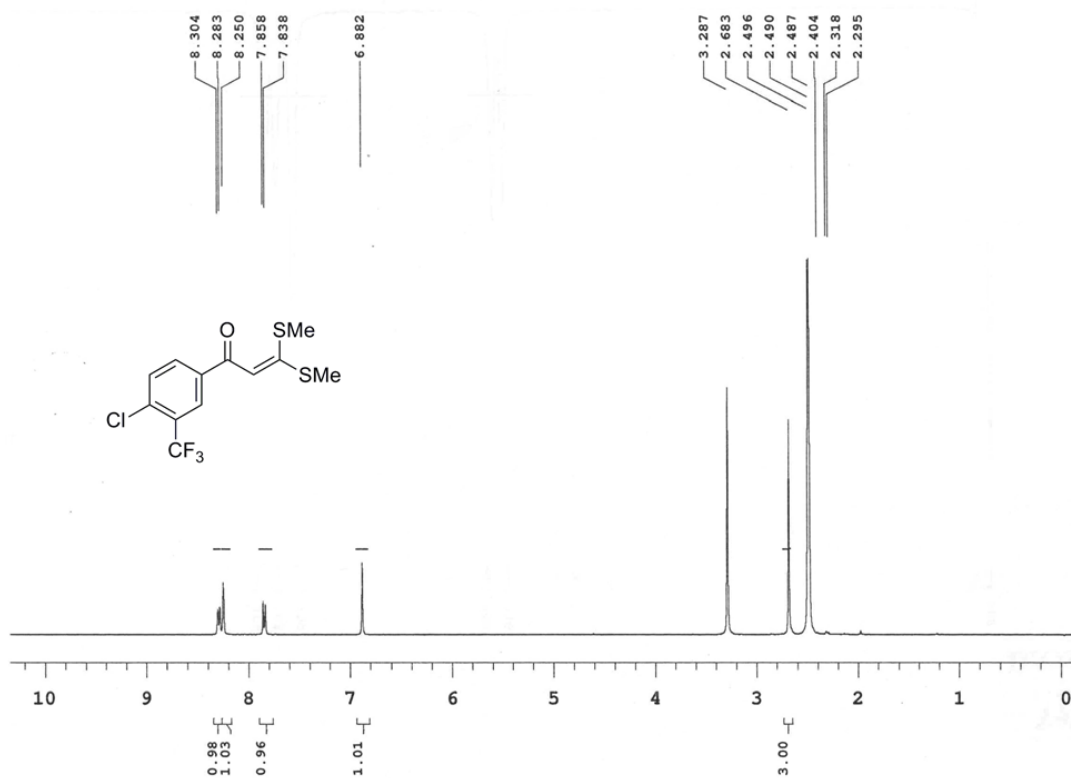

**Figure S15:** (400MHz, DMSO-d<sub>6</sub>) <sup>1</sup>H NMR spectrum of compound **1v**

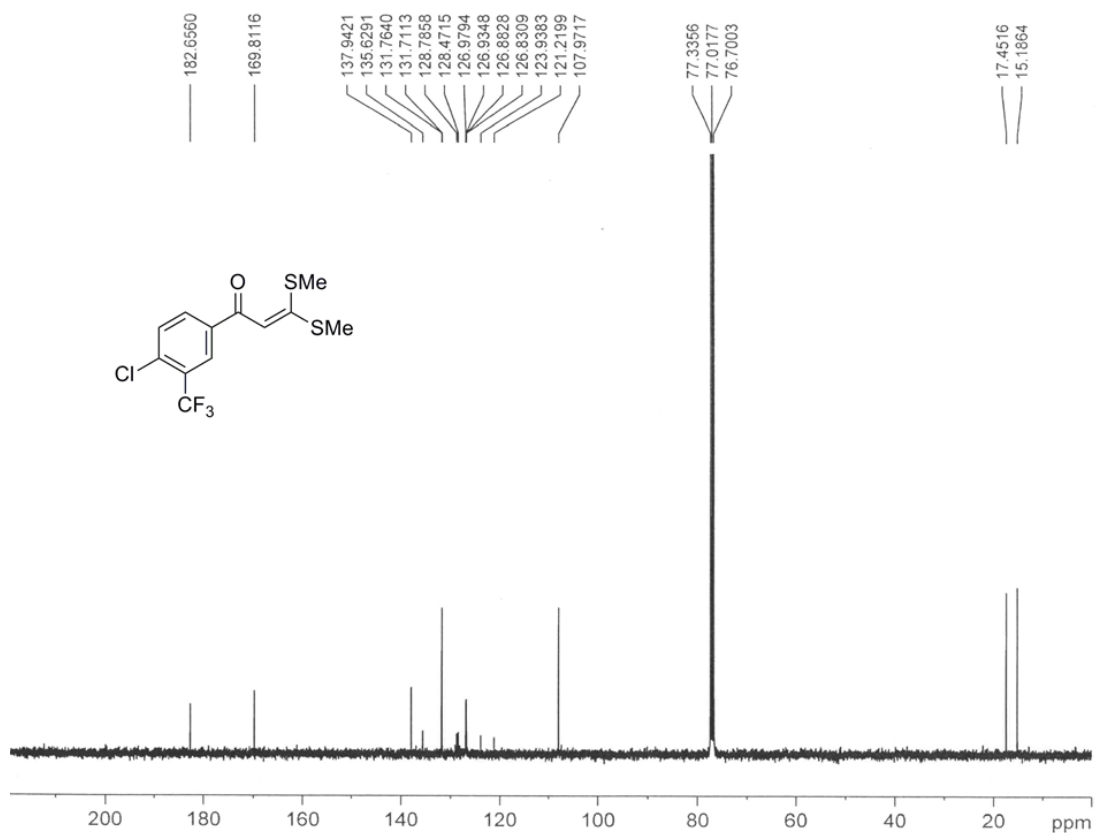

**Figure S16:** (100MHz, CDCl<sub>3</sub>) <sup>13</sup>C NMR spectrum of compound **1v**

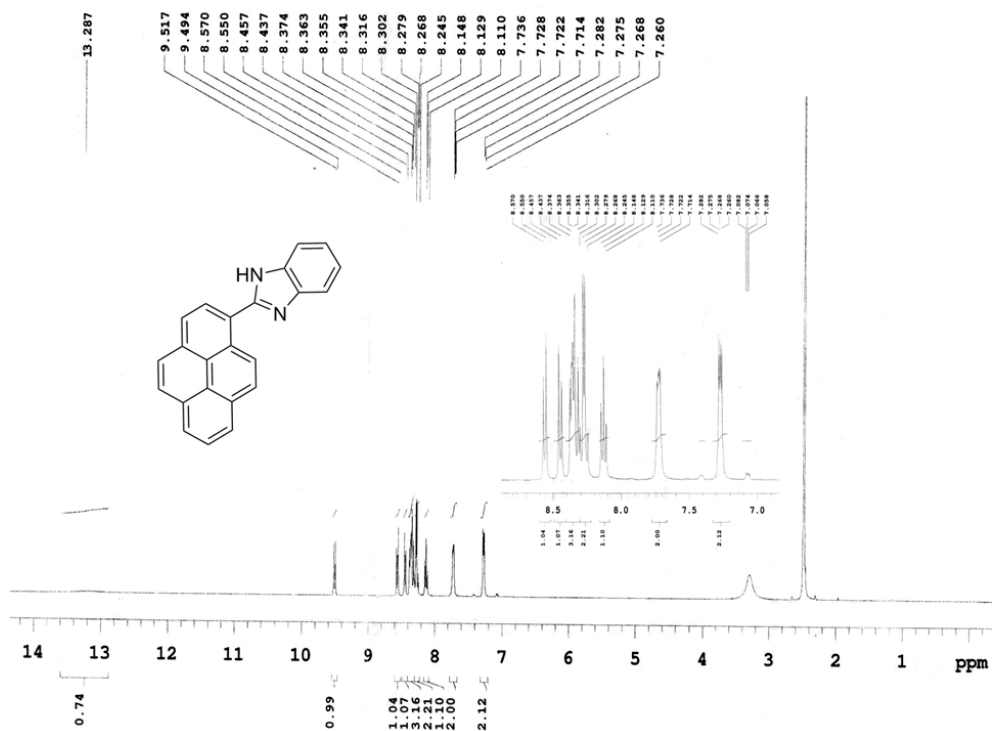

**Figure S17:** (400MHz, DMSO-d<sub>6</sub>) <sup>1</sup>H NMR spectrum of compound 4g

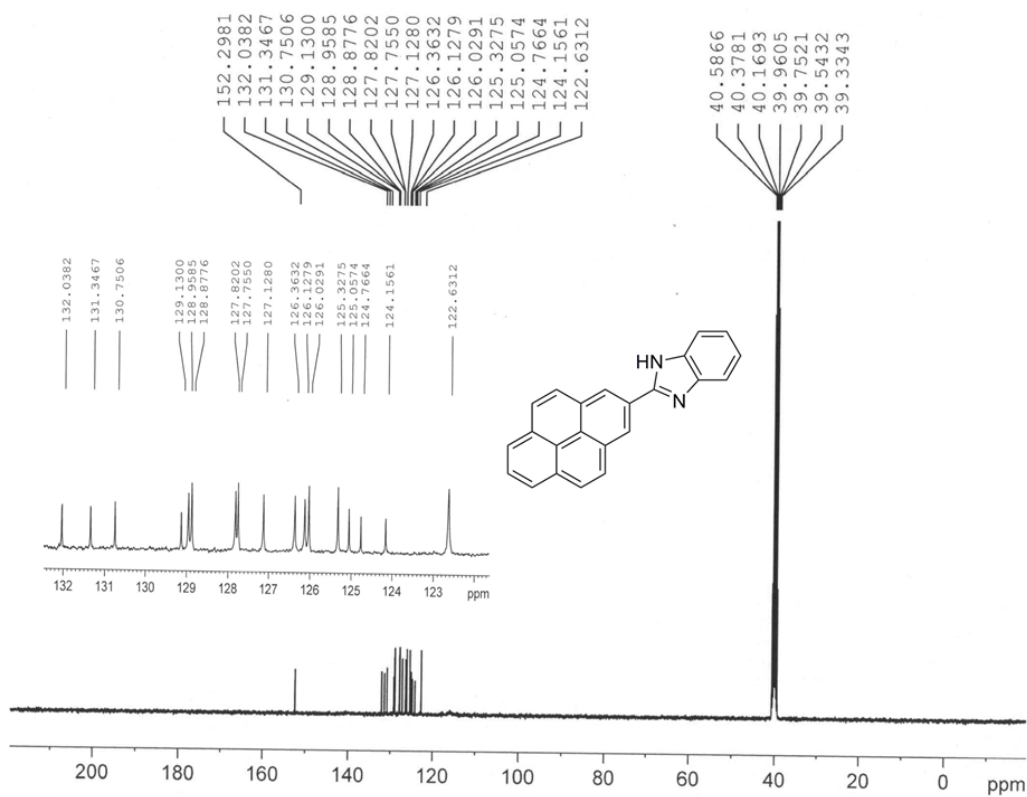

**Figure S18:** (100MHz, DMSO-d<sub>6</sub>) <sup>13</sup>C NMR spectrum of compound 4g

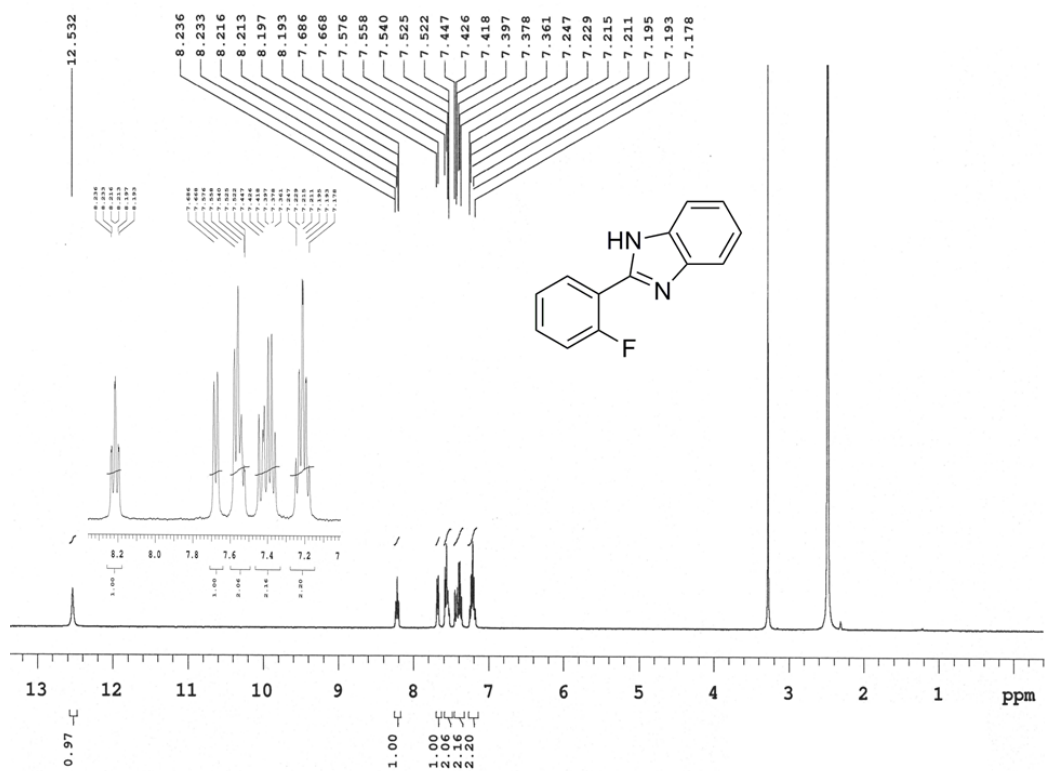

**Figure S19:** (400MHz, DMSO-d<sub>6</sub>) <sup>1</sup>H NMR spectrum of compound **4j**

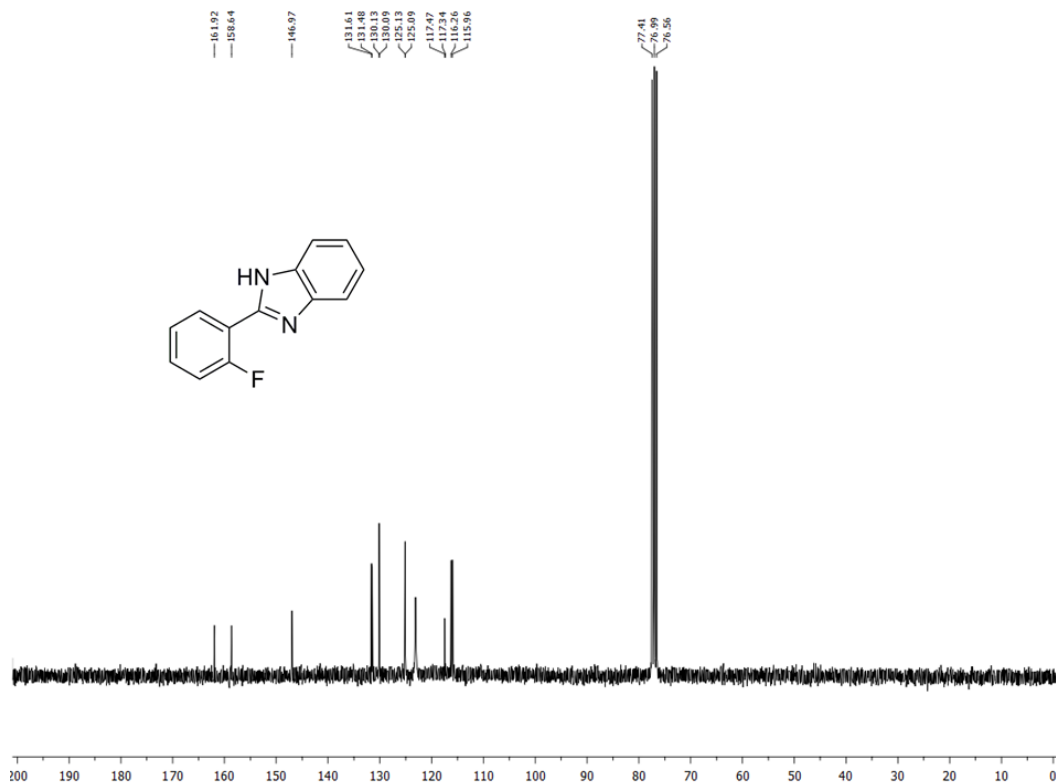

**Figure S20:** (75MHz, DMSO-d<sub>6</sub>) <sup>13</sup>C NMR spectrum of compound **4j**

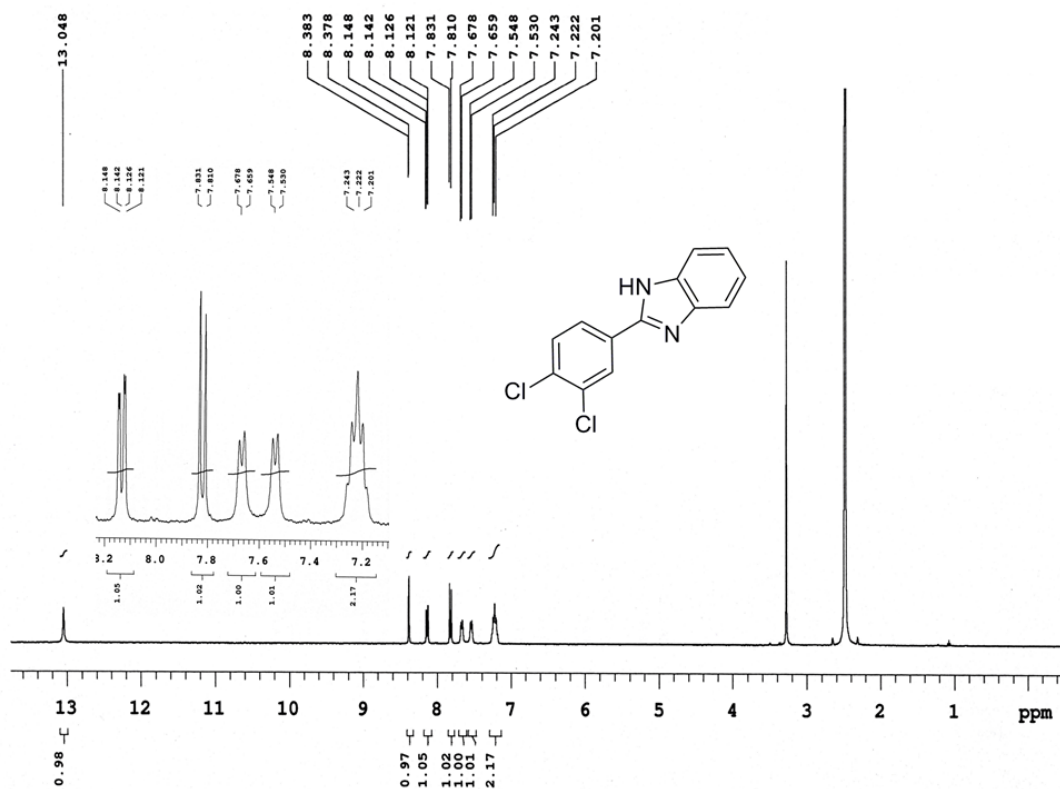

**Figure S21:** (400MHz, DMSO-d<sub>6</sub>) <sup>1</sup>H NMR spectrum of compound **4o**

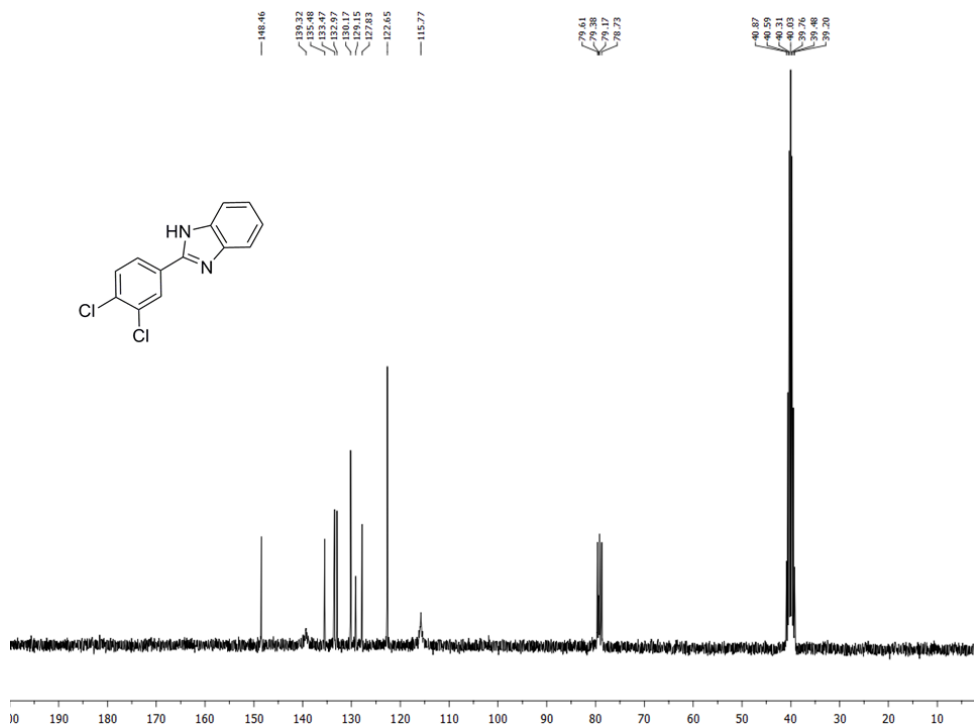

**Figure S22:** (75MHz, DMSO-d<sub>6</sub>) <sup>13</sup>C NMR spectrum of compound **4o**

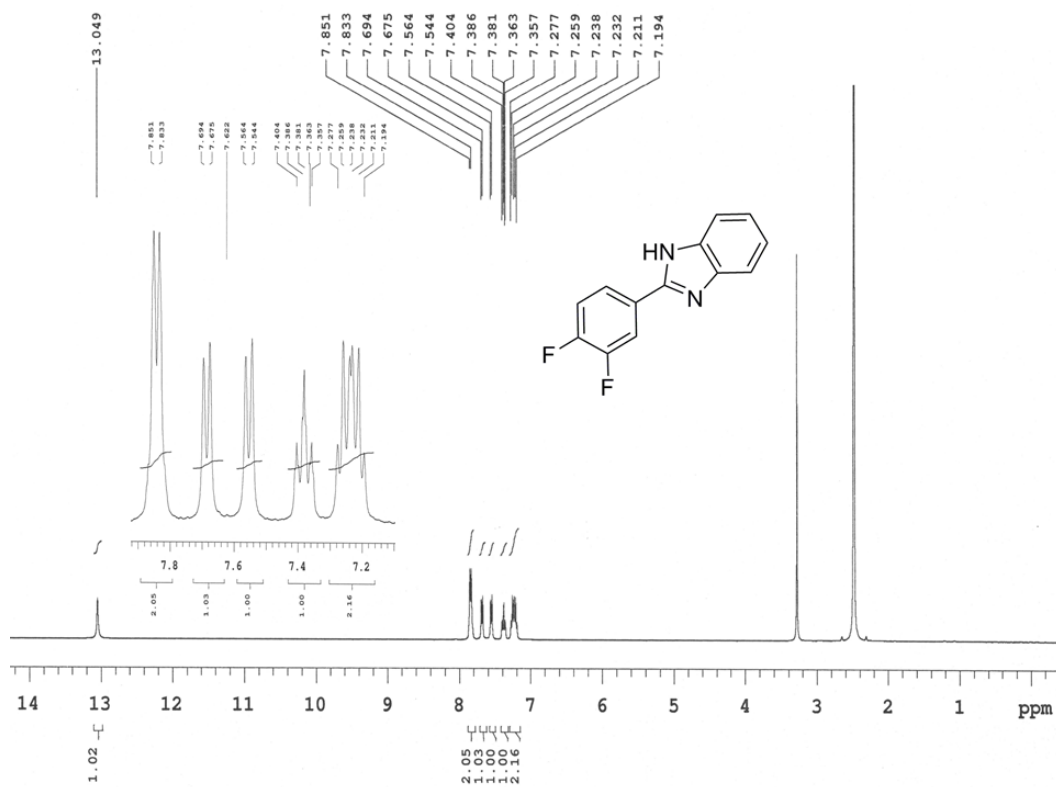

Figure S23: (400MHz, DMSO- $d_6$ )  $^1\text{H}$  NMR spectrum of compound 4p

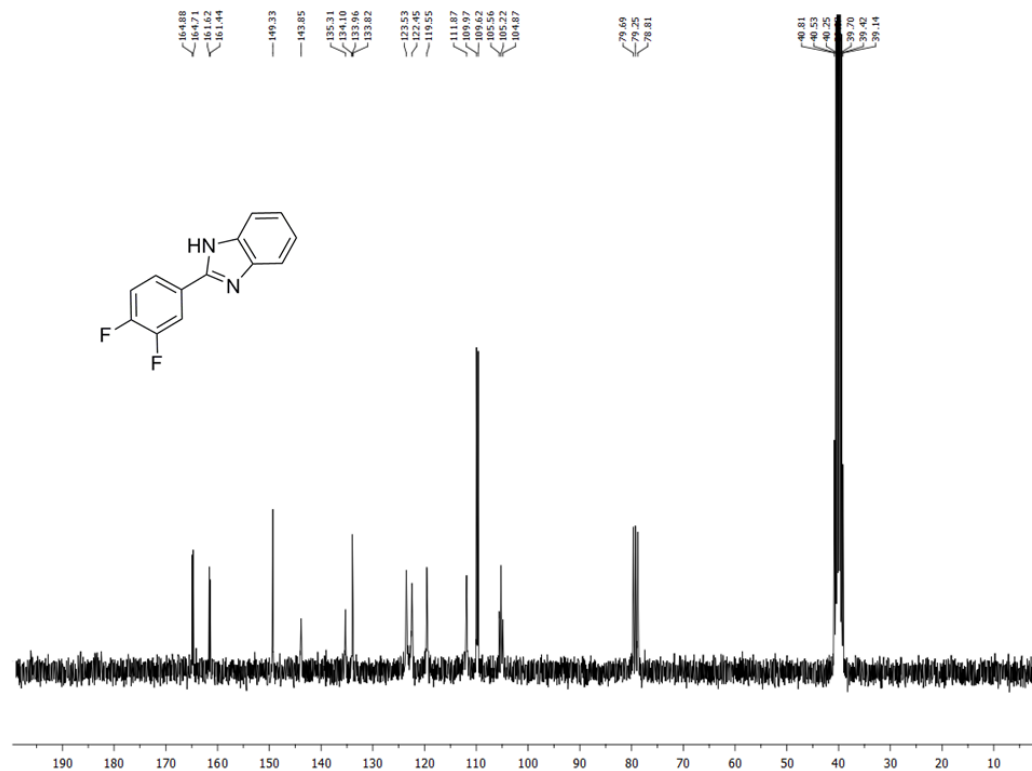

Figure S24: (75MHz, DMSO- $d_6$ )  $^{13}\text{C}$  NMR spectrum of compound 4p

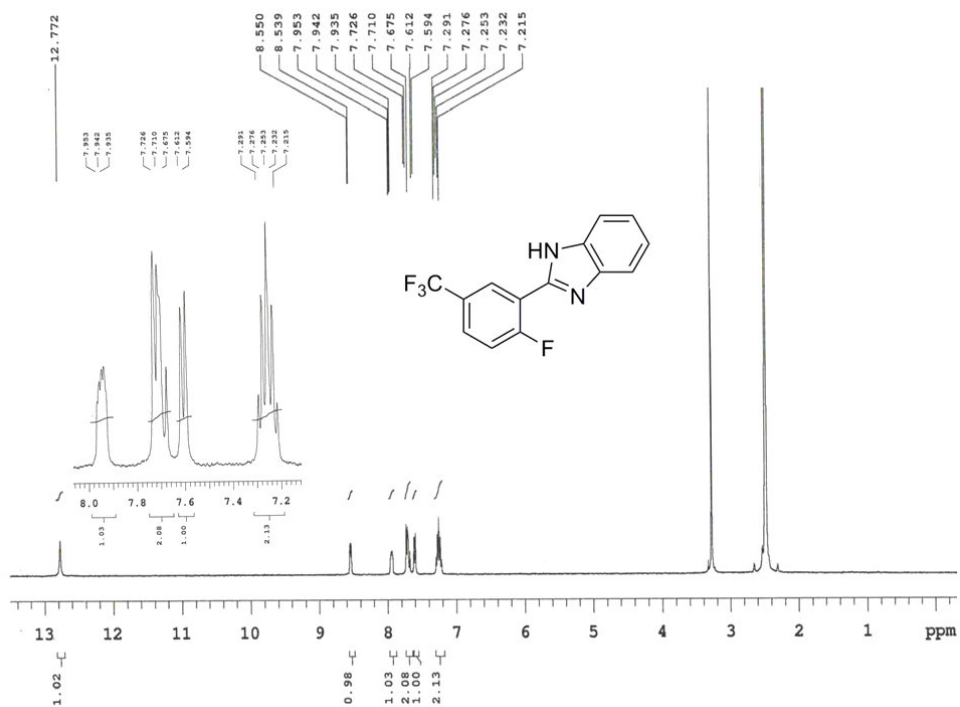

Figure S25: (400MHz, DMSO- $d_6$ )  $^1\text{H}$  NMR spectrum of compound 4s

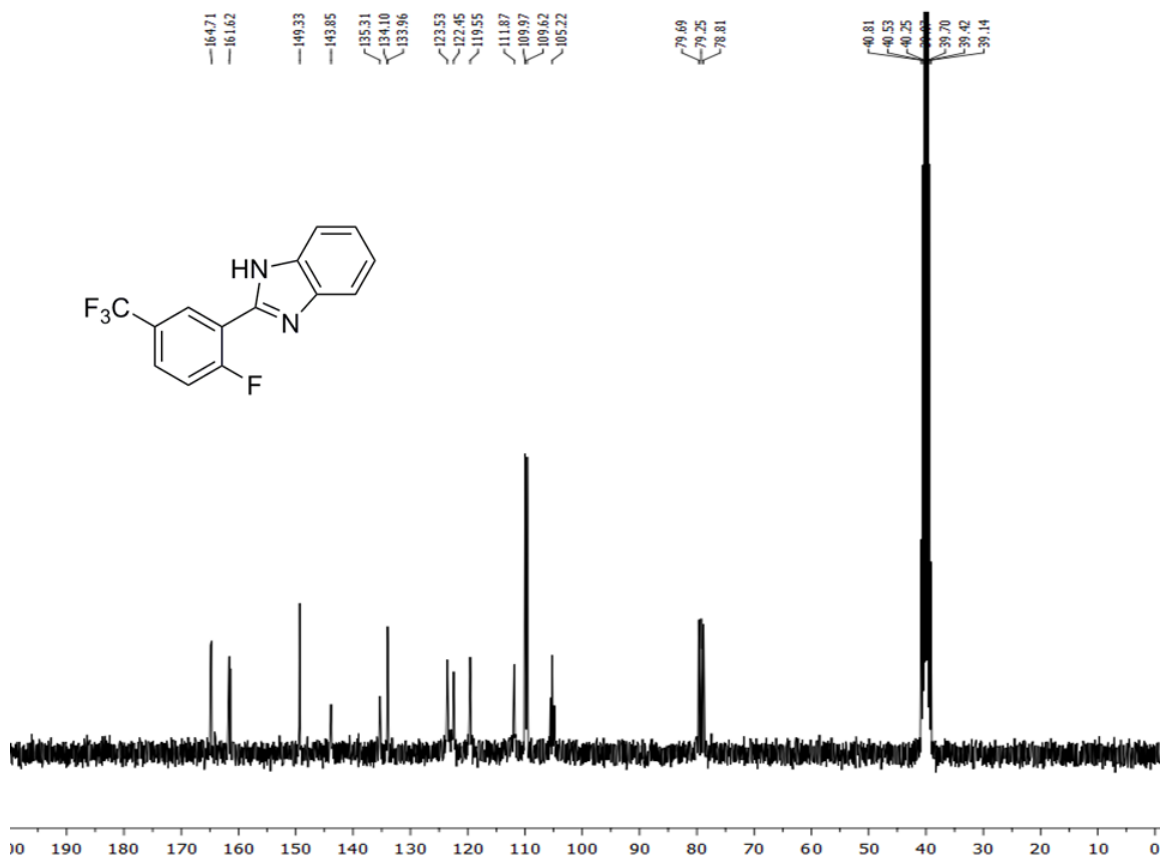

Figure S26: (75MHz, DMSO- $d_6$ )  $^{13}\text{C}$  NMR spectrum of compound 4s

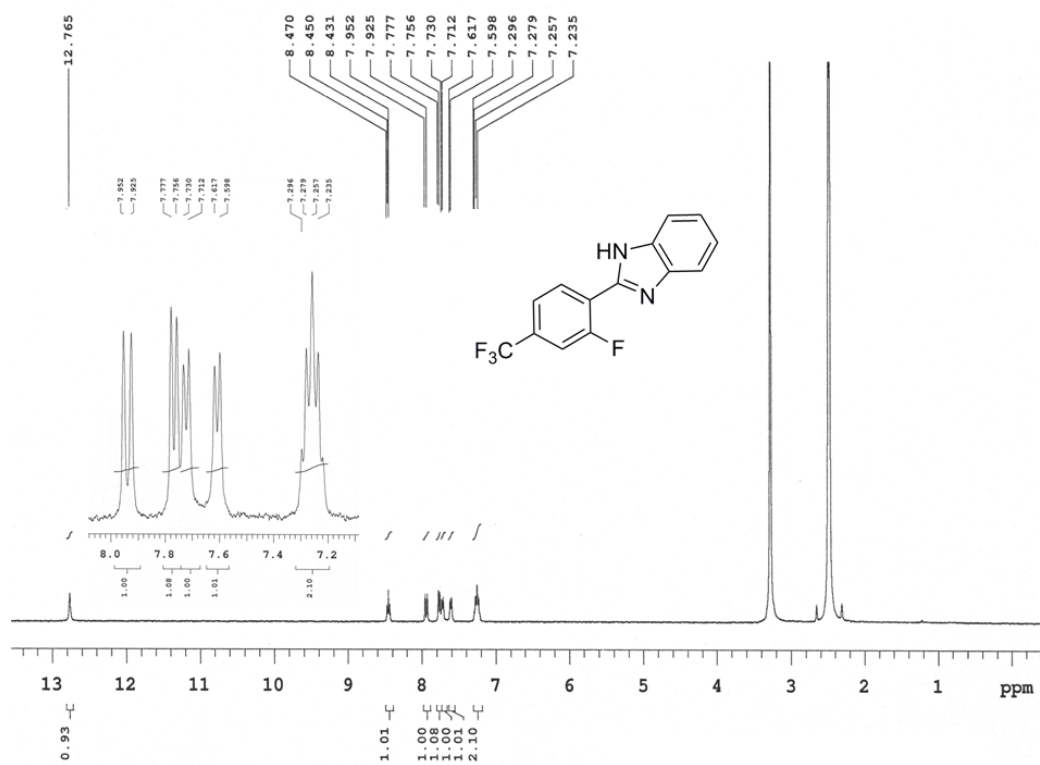

**Figure S27:** (400MHz, DMSO-d<sub>6</sub>) <sup>1</sup>H NMR spectrum of compound **4u**

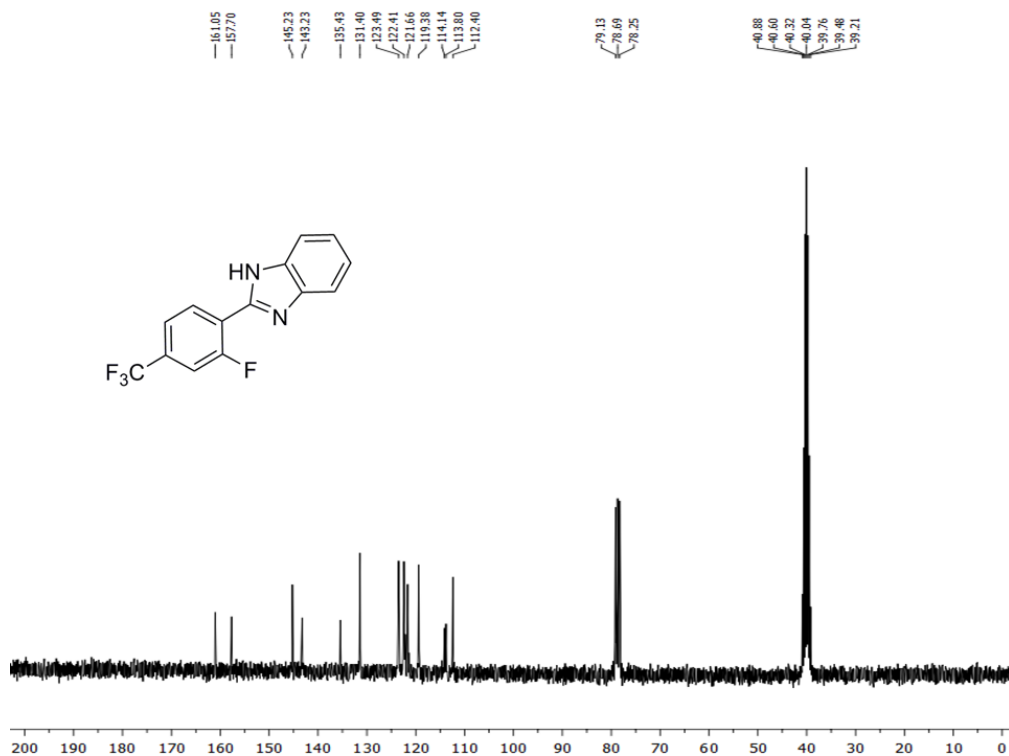

**Figure S28:** (75MHz, DMSO-d<sub>6</sub>) <sup>13</sup>C NMR spectrum of compound **4u**



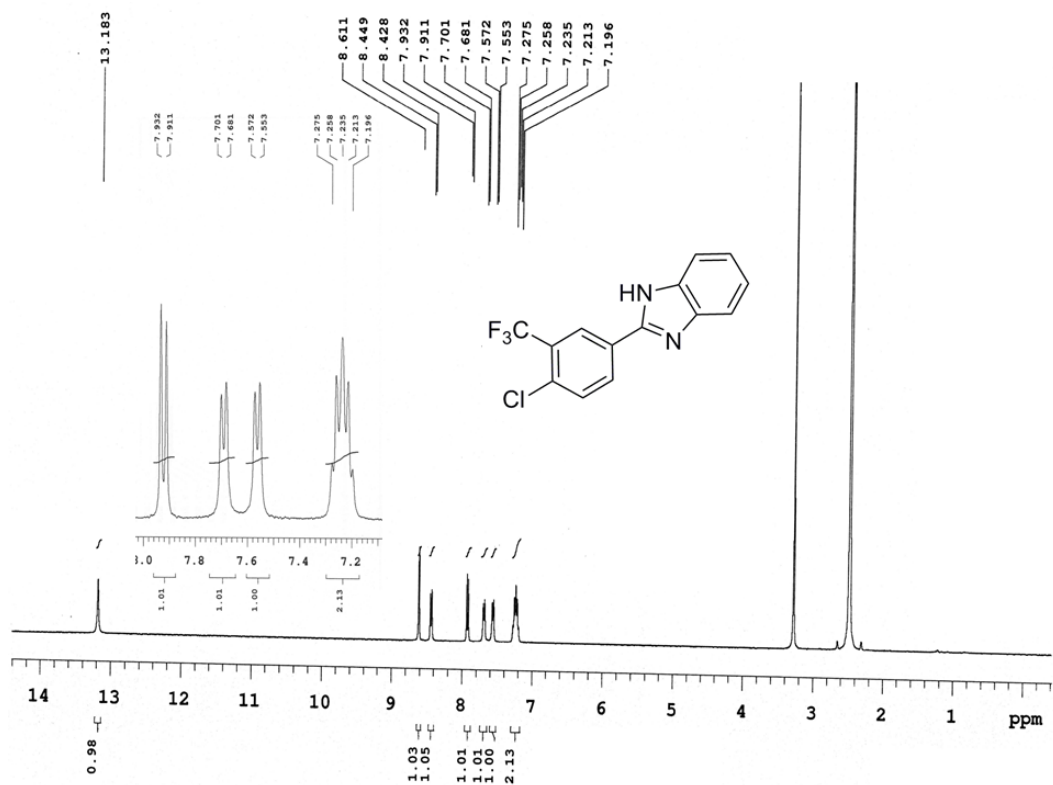

**Figure S29:** (400MHz, DMSO-d<sub>6</sub>) <sup>1</sup>H NMR spectrum of compound 4v

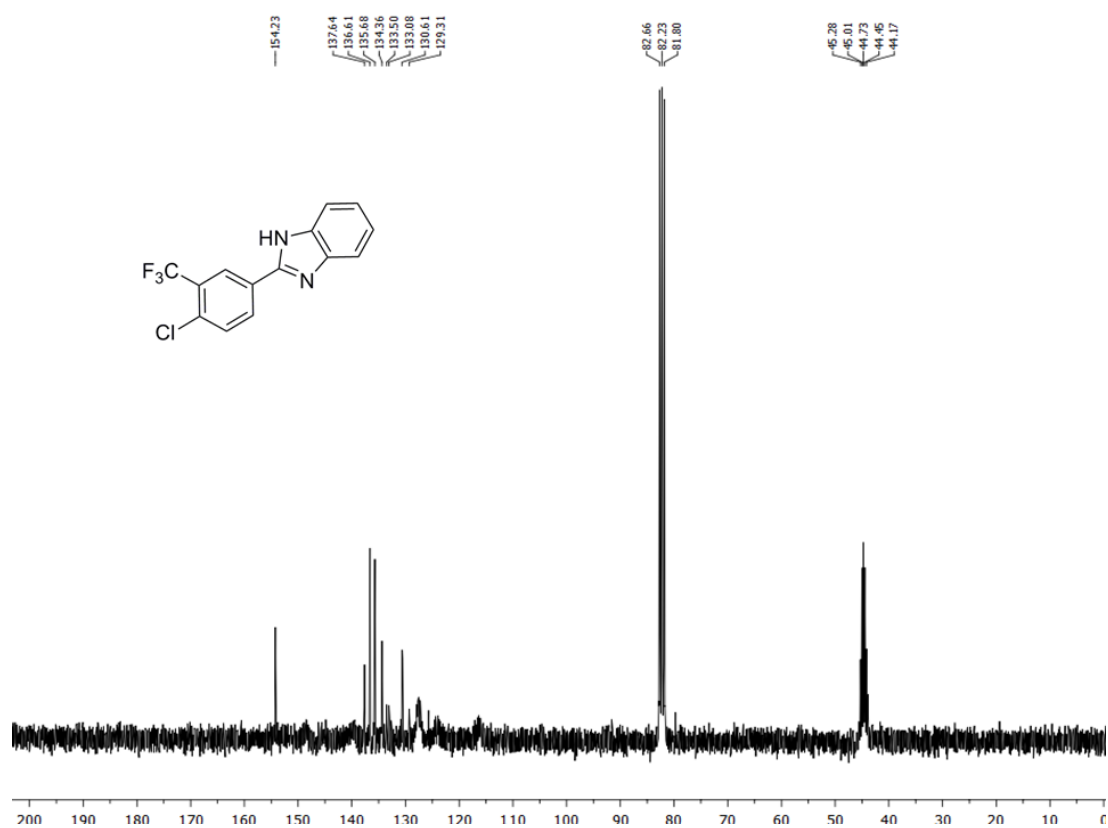

**Figure S30:** (75MHz, DMSO-d<sub>6</sub>) <sup>13</sup>C NMR spectrum of compound 4v
